# Supplementary material
Source: Springer Nature journal article supplement (https://www.springermedizin.de/resource/supplementary/12891_2009_835_MOESM3_ESM.pdf/9507128)

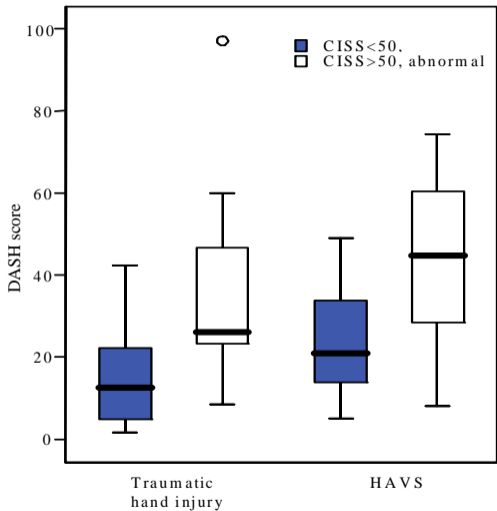

Supplement: MOESM3 [file 9507128]
